# Supplementary material
Source: publisher figshare collection journal article supplement (https://diabetesjournals.figshare.com/ndownloader/files/31491392)
Supplement: Supplementary file 1 [file 31491392]

**Figure S1. *Grp75* expression is unchanged in muscle tissues of insulin resistance mice.**

**A**

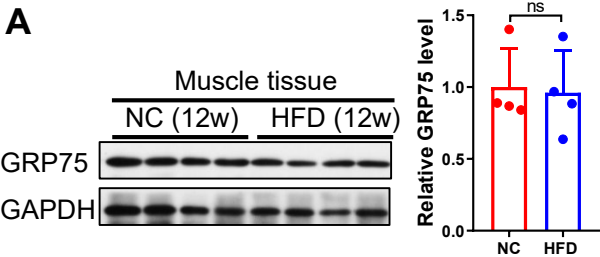

**Figure S2. Transfection efficiency validation in 3T3-L1 and AML12 cells**

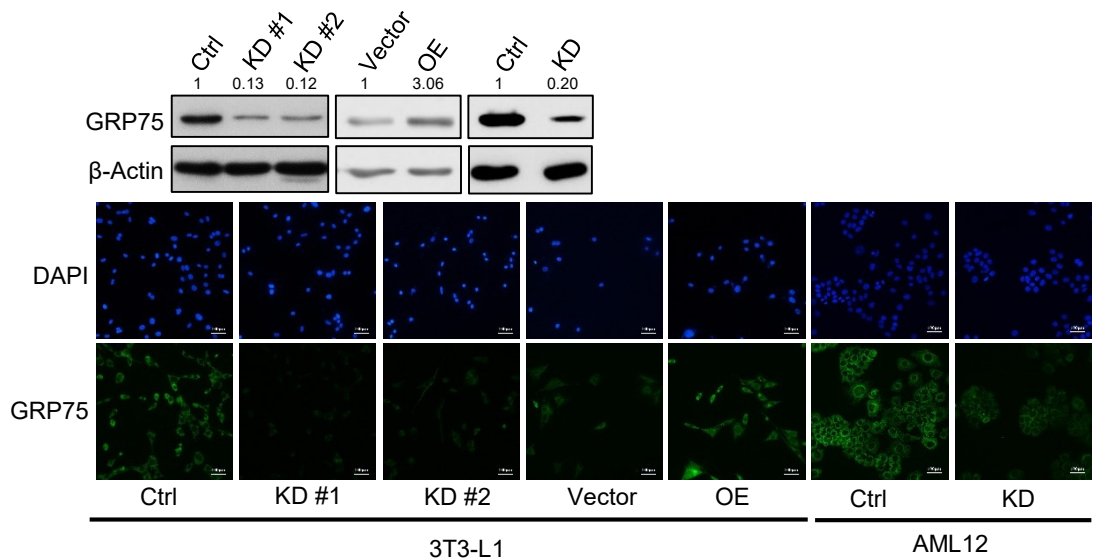

**Figure S3. *Grp75* did not affect the differentiation of 3T3-L1 cells.**

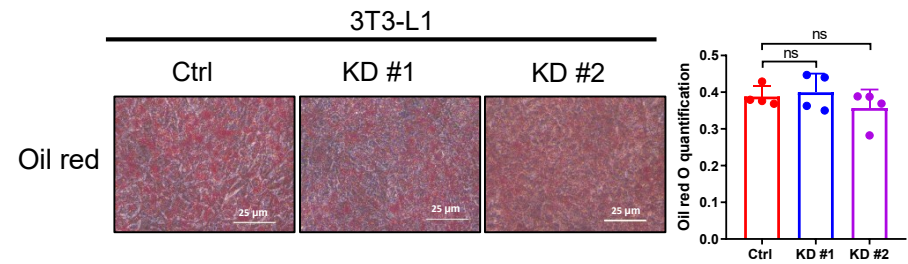

**Figure S4. Related to Figure 2.**

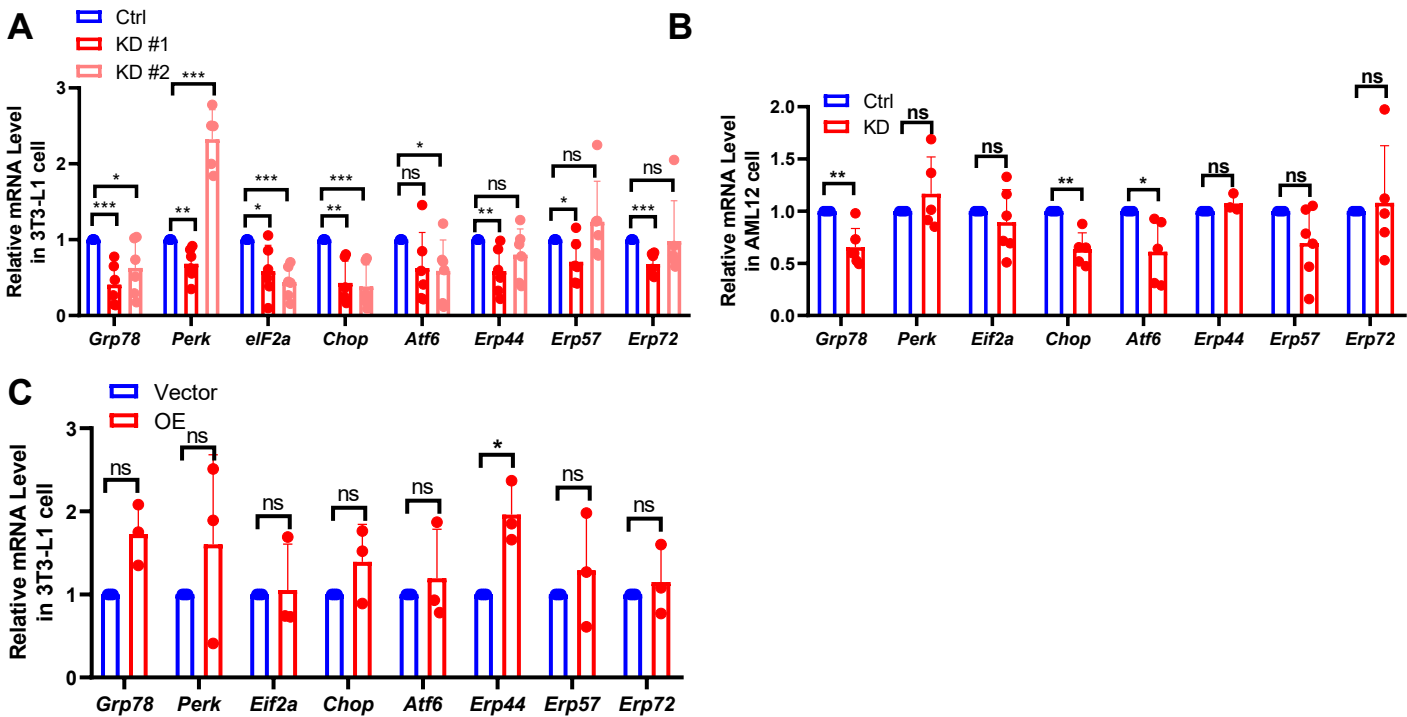

**Figure S5.**

**A**

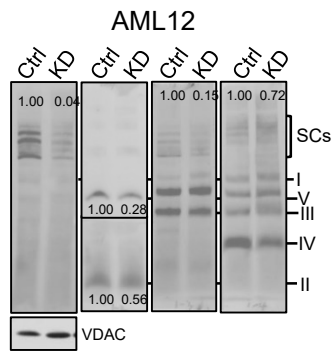

**Figure S6.**

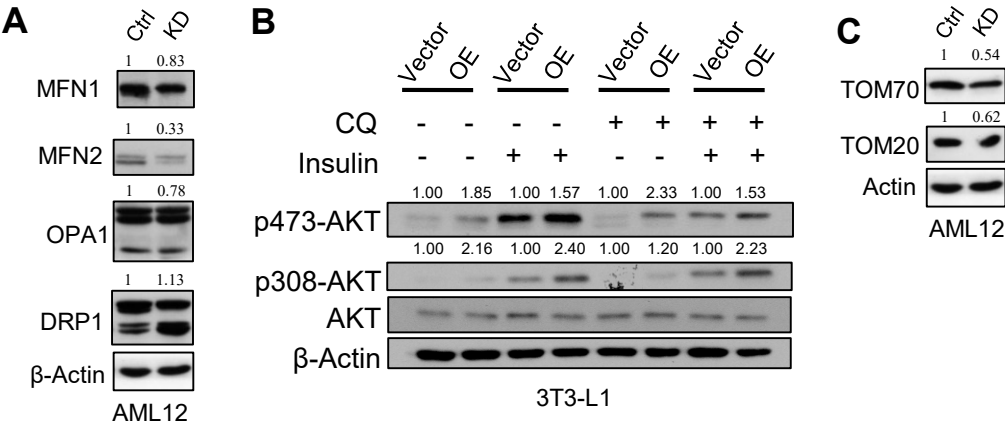

Figure S7

**A**

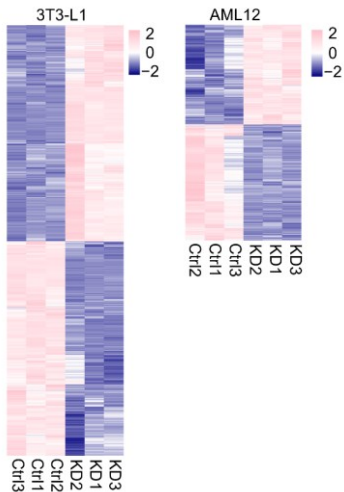

**B**

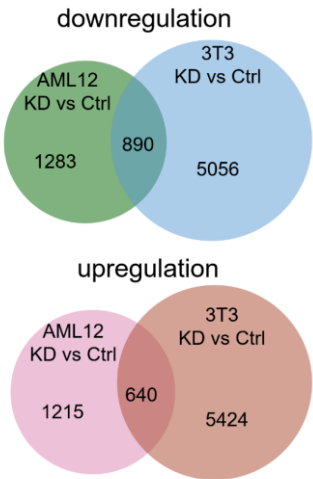

**C**

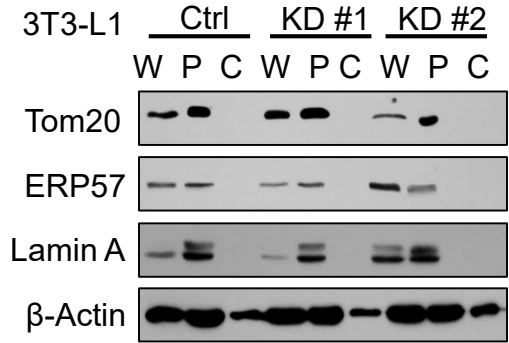

Figure S8

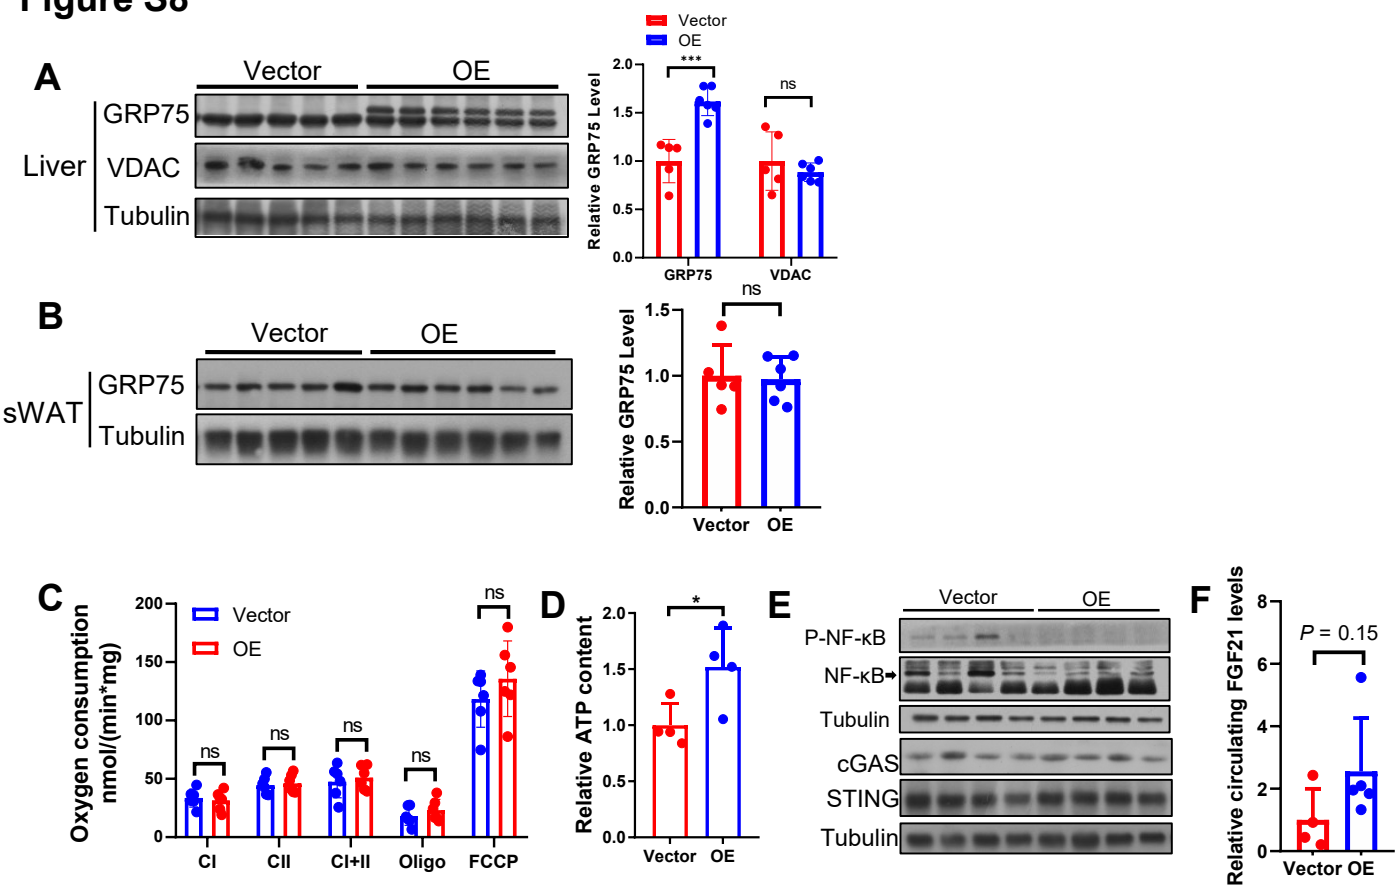



**Figure S1. GRP75 expression is unchanged in muscle tissues of insulin resistance mice.**

Representative western blotting of GRP75 in muscle from C57BL/6J mice fed NC (n = 4) or HFD (n = 4) for 12 weeks.

**Figure S2. Transfection efficiency validation in 3T3-L1 and AML12 cells.**

Western blotting and fluorescence microscopy were used to verify the transfection efficiency in *Grp75*-KD 3T3-L1 or AML12 cells and *Grp75*-OE 3T3-L1 cells.

**Figure S3. GRP75 did not affect the differentiation of 3T3-L1 cells.**

Oil red O staining in differentiated *Grp75*-KD and control 3T3-L1 cell.

**Figure S4. Measurement of the ER stress markers in 3T3-L1 and AML12 cells.**

(A-C) Relative mRNA levels of the ER stress markers in *Grp75*-KD 3T3-L1 or AML12 cells and *Grp75*-OE 3T3-L1 cells.

**Figure S5. Mitochondrial complex content in *Grp75*-KD and control AML12 cells**

BN-PAGE/immunoblotting of digitonin-solubilized cell lysates from *Grp75*-KD and control AML12 cells. Complexes I–V were probed with antibodies against Grim19, SDHA, UQCRC2, COXI, and ATP5a, respectively. VDAC was the internal control.

**Figure S6. Related to Figure 4**

(A) Representative western blotting showing relative amounts of DRP1, OPA1, MFN1/2 in *Grp75*-KD and control AML12 whole-cell extracts. Actin was the internal control.

(B) Representative western blotting showing relative amounts of phospho-Akt Ser473/Thr308 in *Grp75*-OE 3T3-L1 cell treated with or without 5  $\mu$ M chloroquine for 24h. Actin was the internal control.

(C) Representative western blotting showing relative amounts of Tomm20 and Tomm70 in *Grp75*-KD and control AML12 whole-cell extracts.

**Figure S7. Related to Figure 6**

(A) Heatmap showed differentially expression genes in *Grp75*-KD and control 3T3-L1 and AML12 cells.

(B) Venn diagram showed the common downregulated and upregulated genes in *Grp75*-KD and control 3T3-L1 and AML12 cells.

(C) Western blots to detect Tom20, ERP57, Lamin A, and Actin proteins using specific antibodies for each protein. Differential centrifugation was used to isolate the precipitate fraction (P), and cytosolic supernatant fraction (C); the whole cell lysate (W) was used for comparison.

**Figure S8. Related to Figure 7**

(A) Representative western blotting and quantity results of GRP75 and VADC in the liver tissue of Vector (n=5) and *Grp75* overexpressed (n=6) mice. Tubulin was the

internal control.

**(B)** Representative western blotting and quantity results of GRP75 in the sWAT of Vector (n=5) and *Grp75* overexpressed (n=6) mice. Tubulin was the internal control.

**(C)** Rates of oxygen fluxes in the liver of Vector (n=6) and *Grp75* overexpressed (n=6) mice. CI: respiration related to complex I activity, measured in the presence of glutamate and malate; CII: respiration related to complex II activity, measured in the presence of succinate; CI + II: respiration related to combined complex I and II activity, measured in the presence of glutamate, malate, and succinate; Oligo: uncoupled mitochondrial respiration, measured after adding oligomycin; FCCP: maximum oxygen consumption, measured after adding FCCP.

**(D)** Relative ATP content in Vector (n=6) and *Grp75* overexpressed (n=7) mice.

**(E)** Representative western blotting showing relative amounts of phospho-NF- $\kappa$ B (phospho-NF- $\kappa$ B/NF- $\kappa$ B), cGAS and STING in Vector (n=4) and *Grp75* overexpressed (n=4) mice. Tubulin was the internal control.

**(F)** Relative serum FGF21 levels in Vector (n=4) and *Grp75* overexpressed (n=4) mice.

| Regulation | Description                             | P value  | P.adjust | Count |
|------------|-----------------------------------------|----------|----------|-------|
| up         | Cell cycle                              | 2.47E-11 | 6.39E-09 | 22    |
| up         | Progesterone-mediated oocyte maturation | 2.23E-05 | 0.002888 | 12    |
| up         | IL-17 signaling pathway                 | 0.000122 | 0.010533 | 11    |
| up         | TNF signaling pathway                   | 0.000212 | 0.013713 | 12    |
| up         | Colorectal cancer                       | 0.000412 | 0.021329 | 10    |
| up         | Mismatch repair                         | 0.0005   | 0.021584 | 5     |
| up         | Small cell lung cancer                  | 0.000589 | 0.021801 | 10    |
| up         | T cell receptor signaling pathway       | 0.001425 | 0.040646 | 10    |
| up         | p53 signaling pathway                   | 0.001637 | 0.040646 | 8     |
| up         | Hepatitis B                             | 0.001731 | 0.040646 | 13    |
| up         | Human T-cell leukemia virus 1 infection | 0.001886 | 0.040646 | 17    |
| up         | Cellular senescence                     | 0.002033 | 0.040646 | 14    |
| up         | JAK-STAT signaling pathway              | 0.00204  | 0.040646 | 13    |
| down       | Ribosome                                | 1.57E-12 | 4.46E-10 | 32    |
| down       | Biosynthesis of amino acids             | 3.93E-06 | 0.000559 | 14    |
| down       | Carbon metabolism                       | 4.90E-05 | 0.004636 | 16    |
| down       | Aminoacyl-tRNA biosynthesis             | 9.89E-05 | 0.007021 | 11    |
| down       | Autophagy - other                       | 0.000333 | 0.018891 | 7     |
| down       | Fructose and mannose metabolism         | 0.000595 | 0.026653 | 7     |
| down       | Proteasome                              | 0.000657 | 0.026653 | 8     |
| down       | Inositol phosphate metabolism           | 0.001027 | 0.036468 | 10    |
